# Supplementary material
Source: Royal Society of Chemistry journal article supplement (doi:10.1039/d6py00273k)
Supplement: d6py00273k1.pdf [file d6py00273k1.pdf]

## Supplementary Information

### Synergistic Short and Long Spacer Fluorinated Chain Extenders for Low Refractive Index Waterborne Polyurethane Acrylate Coatings

Haoxin Jing<sup>a</sup>, Yuchao Yang<sup>a</sup>, Lei Yang<sup>a</sup>, Yupeng Zhang<sup>a</sup>, Caiping Ma<sup>\*,a</sup>, Jianbing Wu<sup>b</sup>, Baojun Wang<sup>a,c</sup>, Yao Xu<sup>d</sup>, Lixia Ling<sup>\*,a</sup>

<sup>a</sup> College of Chemistry and Chemical Engineering, Taiyuan University of Technology, Taiyuan 030024, Shanxi, People's Republic of China

<sup>b</sup> Hebei Xiong'an New Materials Science and Technology Co., Ltd., Xiong'an 071800, Hebei, People's Republic of China

<sup>c</sup> State Key Laboratory of Clean and Efficient Coal Utilization, Taiyuan University of Technology, Taiyuan 030024, Shanxi, People's Republic of China

<sup>d</sup> Xi'an Institute of Optics and Precision Mechanics, Chinese Academy of Sciences, Xi'an 710119, Shaanxi, People's Republic of China

---

\* Corresponding author at: No. 79 West Yingze Street, Taiyuan 030024, China. Tel.: +86 351 6018223; Fax: +86 351 6041237  
E-mail address: macaiping@tyut.edu.cn (C.P. Ma)

\* Corresponding author at: No. 79 West Yingze Street, Taiyuan 030024, China. Tel.: +86 351 6018223; Fax: +86 351 6041237  
E-mail address: linglixia@tyut.edu.cn (L.X. Ling)

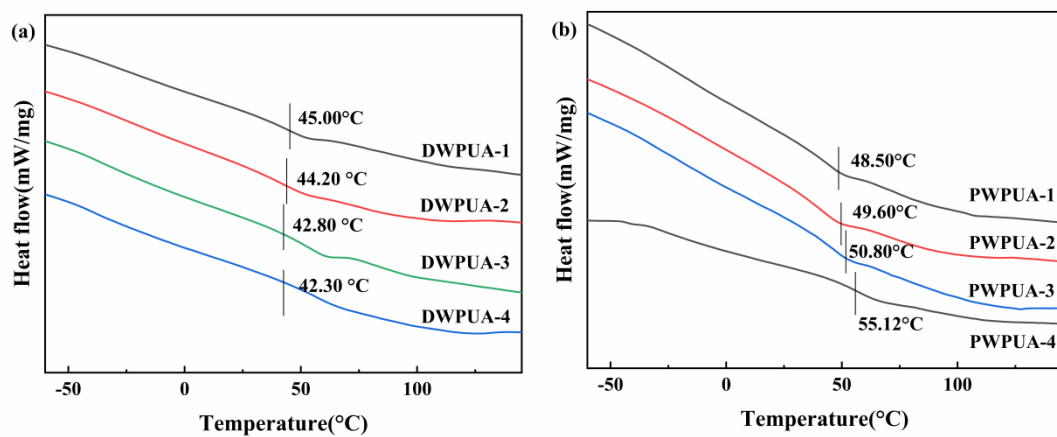

Fig S1 DSC curves of (a) DWPUA-1~4 and (b) PWPUA-1~4.

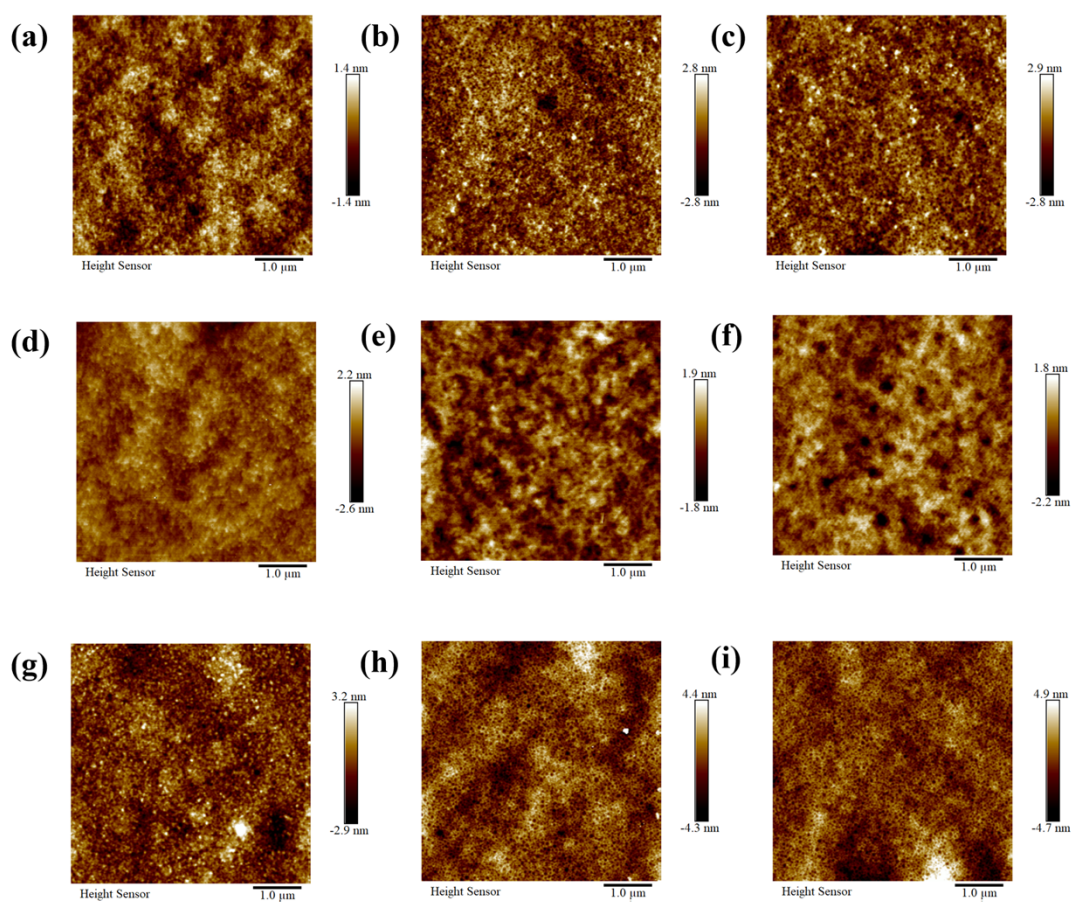

Fig S2. AFM images of DWPUA-1~3 (a-c), PWPUA-1~3 (d-f), and DPWPUA-1~3 (g-i).

**Table S1** Surface roughness of DWPUA1~3, PWPUA1~3, and DPWPUA1~3 coatings

determined by AFM.

| Samples  | R <sub>a</sub> (nm) | R <sub>q</sub> (nm) |
|----------|---------------------|---------------------|
| DWPUA-1  | 0.334               | 0.417               |
| DWPUA-2  | 0.611               | 0.777               |
| DWPUA-3  | 0.609               | 0.773               |
| PWPUA-1  | 0.333               | 0.427               |
| PWPUA-2  | 0.418               | 0.525               |
| PWPUA-3  | 0.429               | 0.553               |
| DPWPUA-1 | 0.628               | 0.818               |
| DPWPUA-2 | 0.948               | 1.300               |
| DPWPUA-3 | 0.940               | 1.230               |

**Table S2** Comparison of low refractive index materials.

| Material System            | Refractive index | Trans. (%)  | WCA (°)   | PET Adhesion     | Flexibility | Ref.      |
|----------------------------|------------------|-------------|-----------|------------------|-------------|-----------|
| UV-WPUA                    | 1.507            | 92.84       | 114.4     | Grade 0          | Good        | This work |
| WPU                        | 1.532            | 87.6        | —         | —                | —           | [1]       |
| UV-WPUA                    | ≈1.50-1.52       | —           | 100.8     | —                | —           | [2]       |
| Solvent UV epoxy           | 1.4930-1.5576    | 90.8-91.3   | 66.1-79.2 | Glass            | Rigid       | [3]       |
| Solvent polycarbonate      | 1.495-1.51       | Transparent | —         | SiO <sub>2</sub> | —           | [4]       |
| iCVD p(PFDA-co-VP)         | 1.36             | >90         | 122       | —                | Flexible    | [5]       |
| pF8NDC                     | 1.361            | High        | —         | —                | —           | [6]       |
| Porous Teflon AF           | 1.10-1.45        | High        | —         | Acrylic          | —           | [7]       |
| Fluoro polysilsesquioxanes | 1.335-1.427      | High        | 92-131    | Glass            | —           | [8]       |
| poly(methylmethacrylate)   | 1.23-1.26        | High        | 120       | Glass            | —           | [9]       |

- 
- [1] Z. Sun, H. J. Fan, Y. Chen and J. J. Huang, *Polym. Int.*, 2018, **67**, 78–84.
- [2] H. D. Hwang and H. J. Kim, *J. Colloid Interface Sci.*, 2011, **362**, 274–284
- [3] B. L. Wang, N. N. Zhao, J. W. Wu, Z. C. Pan, C. Zhao and M. W. Pan, *J. Appl. Polym. Sci.*, 2023, **140**, e54250.
- [4] Z. Z. Cai, Q. X. Yu, Y. Zheng, X. Y. Shi, X. S. Wang, Z. C. Cui, Z. S. Shi, C. M. Chen and D. M. Zhang, *RSC Adv.*, 2017, **7**, 19136–19144.
- [5] Y. N. Zhao, F. Hu and W. E. Tenhaeff, *Macromolecules*, 2025, **58**, 1265–1278.
- [6] S. Song, Y. Chang, S. H. Oh, S. Kim, S. Choi, S. Kim, J. K. Lee, S. H. Choi and J. Lim, *Macromolecules*, 2022, **55**, 1515–1523.
- [7] B. M. Wang, C. J. Ruud, J. S. Price, H. Kim and N. C. Giebink, *Nano Lett.* 2019, **19**, 787–792
- [8] C. Hartmann-Thompson and D. Soro, *Silicon*, 2021, **13**, 4215–4222.
- [9] C. Dutriez, K. Satoh, M. Kamigaito and H. Yokoyama, *Polym. J.*, 2016, **48**, 497–501.
